# Supplementary material for: Tumor Tropic Delivery of Hyaluronic Acid-Poly (D,L-lactide-co-glycolide) Polymeric Micelles Using Mesenchymal Stem Cells for Glioma Therapy
Source: MDPI journal article supplement (doi:10.3390/molecules27082419), 2022-04-08
Supplement: s1 [file s1]

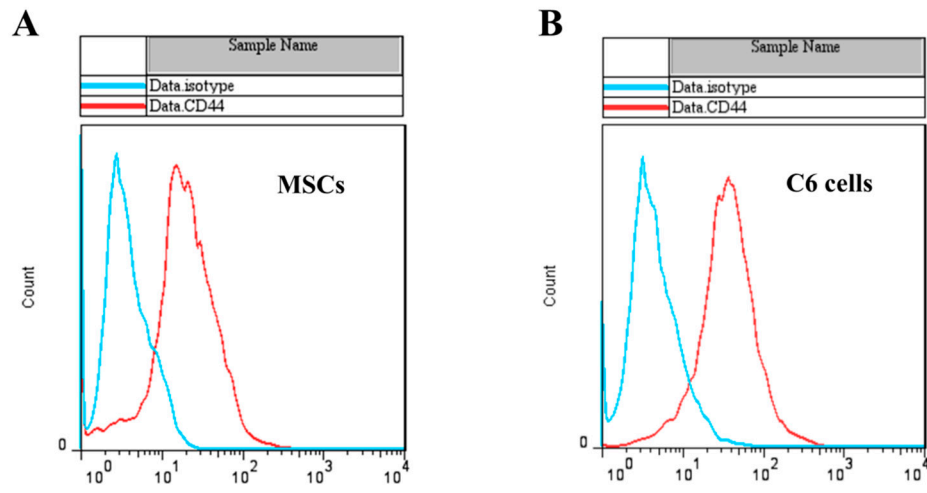

**Figure S1:** Flow cytometric analysis of CD44 expressed on the surface of (A) MSCs and (B) C6 glioma cells.

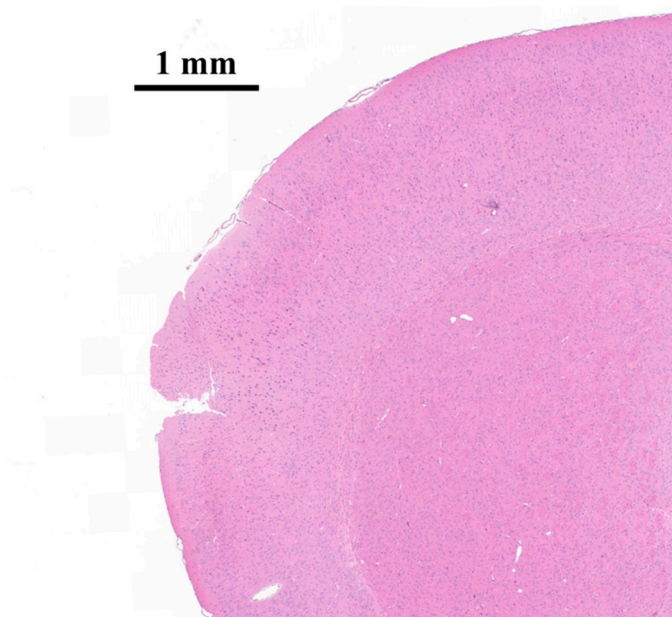

**Figure S2:** H&E staining of brain section at the MSCs-micelles injection site.

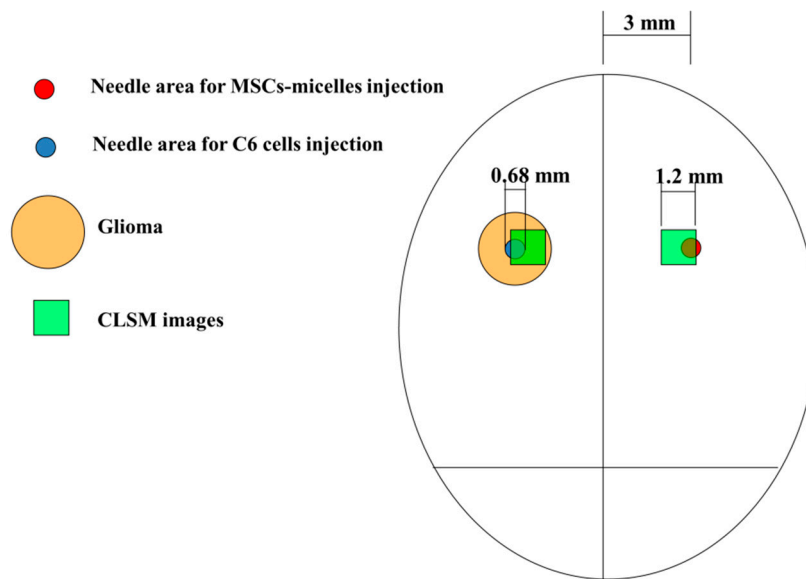

**Figure S3:** The relative locations for glioma implantation, MSCs-micelles injection, and CLSM observation (cross section).
